# Supplementary material for: Model-based Analysis of ChIP-Seq (MACS)
Source: Springer Nature journal article supplement (doi:10.1186/gb-2008-9-9-r137), 2008-09-17

**(a)**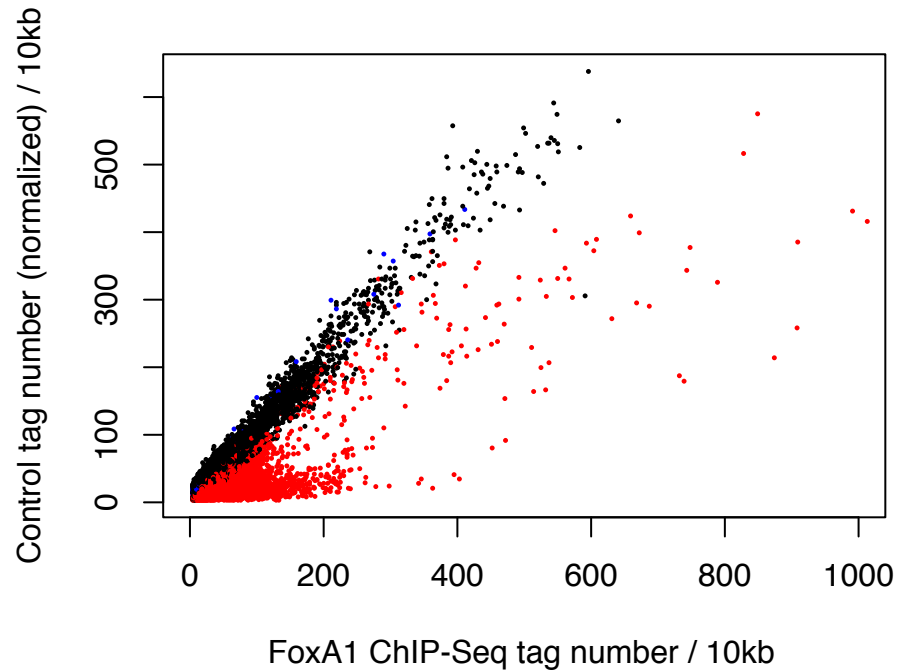**(b)**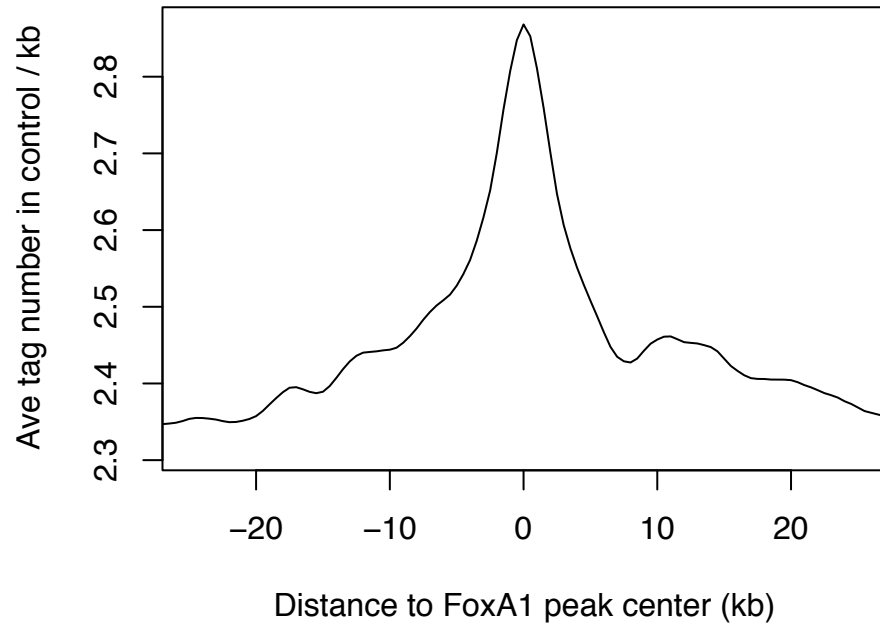

Supplement: 13059_2008_1999_MOESM5_ESM.pdf [file 13059_2008_1999_MOESM5_ESM.pdf]
